# Supplementary material for: Understanding COVID-19 Vaccine Acceptance among Latin American Health Workers: Implications for Designing Interventions
Source: MDPI journal article supplement (doi:10.3390/vaccines11091471), 2023-09-10
Supplement: s1 [file s1]

*Supplementary Materials*

## **Understanding COVID-19 Vaccine Acceptance among Latin American Health Workers: Implications for Designing Interventions**

Rivera, T.; Brustrom, J.; Antelo, M.V.; Puertas, E.B.; Rhoda, D.A.; Velandia-Gonzalez, M. (2023)

| File | Contents                                                                                                   |
|------|------------------------------------------------------------------------------------------------------------|
| S1   | Survey instrument (Spanish)                                                                                |
| S2   | Survey instrument (English)                                                                                |
| S3   | Percent of respondents, by demographic and COVID-19-related characteristics, region, and country of origin |
