# Supplementary material for: Understanding COVID-19 Vaccine Acceptance among Latin American Health Workers: Implications for Designing Interventions
Source: MDPI journal article supplement (doi:10.3390/vaccines11091471), 2023-09-10
Supplement: s1 [file s1]

53. Percent of respondents, by demographic and COVID-19-related characteristics, region, and country of origin

| Respondent Demographic and COVID-19-related Characteristics                                          | Respondent Region and Country of Origin           |                |                    |               |               |               |               |                  |                                                   |                 |               |                |                |                 |                                                   |                |               |               |                 | All 16 Countries                                  |
|------------------------------------------------------------------------------------------------------|---------------------------------------------------|----------------|--------------------|---------------|---------------|---------------|---------------|------------------|---------------------------------------------------|-----------------|---------------|----------------|----------------|-----------------|---------------------------------------------------|----------------|---------------|---------------|-----------------|---------------------------------------------------|
|                                                                                                      | Central America                                   |                |                    |               |               |               |               | Andean Community |                                                   |                 |               |                |                | Southern Cone   |                                                   |                |               |               |                 |                                                   |
|                                                                                                      | Costa Rica                                        | Cuba           | Dominican Republic | El Salvador   | Guatemala     | Honduras      | Panama        | Total            | Bolivia                                           | Colombia        | Ecuador       | Peru           | Venezuela      | Total           | Argentina                                         | Chile          | Paraguay      | Uruguay       | Total           |                                                   |
| All<br>(unweighted)<br>N (Weighted by number of doctors and nurses in the country)                   | 1038<br>36,179                                    | 307<br>181,198 | 207<br>31,264      | 264<br>30,205 | 318<br>62,293 | 414<br>11,939 | 307<br>20,544 | 2855<br>373,622  | 293<br>28,977                                     | 1056<br>192,488 | 517<br>80,074 | 219<br>121,853 | 305<br>110,556 | 2390<br>533,948 | 324<br>297,694                                    | 458<br>121,716 | 259<br>17,899 | 432<br>41,405 | 1473<br>478,714 | 6718<br>1,386,284                                 |
| Healthcare Worker Type                                                                               |                                                   |                |                    |               |               |               |               |                  |                                                   |                 |               |                |                |                 |                                                   |                |               |               |                 |                                                   |
| Physicians                                                                                           | 22                                                | 24             | 51                 | 46            | 42            | 31            | 46            | 32               | 23                                                | 11              | 34            | 29             | 32             | 24              | 41                                                | 52             | 34            | 47            | 44              | 33                                                |
| Licensed Nurses and Midwives                                                                         | 20                                                | 31             | 5                  | 25            | 11            | 17            | 3             | 22               | 45                                                | 60              | 31            | 44             | 26             | 44              | 22                                                | 23             | 31            | 12            | 22              | 30                                                |
| Other Health Professionals                                                                           | 25                                                | 30             | 36                 | 14            | 11            | 29            | 45            | 26               | 11                                                | 23              | 25            | 16             | 26             | 22              | 21                                                | 18             | 22            | 13            | 19              | 22                                                |
| Health Technicians                                                                                   | 20                                                | 4              | 3                  | 11            | 28            | 14            | 3             | 10               | 19                                                | 2               | 5             | 8              | 8              | 6               | 7                                                 | 4              | 2             | 21            | 7               | 8                                                 |
| Others                                                                                               | 13                                                | 10             | 5                  | 5             | 9             | 9             | 4             | 9                | 2                                                 | 5               | 5             | 3              | 9              | 5               | 9                                                 | 4              | 10            | 6             | 8               | 7                                                 |
| Gender                                                                                               |                                                   |                |                    |               |               |               |               |                  |                                                   |                 |               |                |                |                 |                                                   |                |               |               |                 |                                                   |
| Male                                                                                                 | 28                                                | 27             | 21                 | 31            | 42            | 27            | 38            | 30               | 29                                                | 20              | 33            | 34             | 18             | 25              | 23                                                | 36             | 22            | 19            | 26              | 27                                                |
| Female                                                                                               | 72                                                | 72             | 79                 | 69            | 58            | 73            | 63            | 70               | 71                                                | 80              | 67            | 66             | 82             | 75              | 77                                                | 64             | 78            | 82            | 74              | 73                                                |
| Other                                                                                                | 0                                                 | 0              | 0                  | 0             | 0             | 0             | 0             | 0                | 0                                                 | 0               | 0             | 0              | 0              | 0               | 0                                                 | 0              | 0             | 0             | 0               | 0                                                 |
| Age                                                                                                  | Q1 (19-33) - Q2 (34-43) - Q3 (44-52) - Q4 (53-82) |                |                    |               |               |               |               |                  | Q1 (20-31) - Q2 (32-40) - Q3 (41-51) - Q4 (52-81) |                 |               |                |                |                 | Q1 (22-40) - Q2 (41-51) - Q3 (52-59) - Q4 (60-83) |                |               |               |                 | Q1 (19-34) - Q2 (35-44) - Q3 (45-55) - Q4 (56-83) |
| Age quartile 1                                                                                       | 27                                                | 13             | 41                 | 41            | 60            | 39            | 8             | 28               | 18                                                | 41              | 37            | 9              | 9              | 25              | 19                                                | 39             | 44            | 35            | 26              | 26                                                |
| Age quartile 2                                                                                       | 38                                                | 16             | 34                 | 27            | 24            | 26            | 29            | 23               | 42                                                | 26              | 32            | 22             | 31             | 28              | 26                                                | 20             | 30            | 34            | 25              | 26                                                |
| Age quartile 3                                                                                       | 35                                                | 12             | 20                 | 10            | 19            | 17            | 22            | 25               | 25                                                | 18              | 22            | 28             | 28             | 23              | 28                                                | 15             | 18            | 19            | 24              | 24                                                |
| Age quartile 4                                                                                       | 16                                                | 36             | 14                 | 13            | 6             | 18            | 41            | 25               | 14                                                | 15              | 9             | 42             | 33             | 24              | 27                                                | 26             | 8             | 12            | 25              | 25                                                |
| Race/Ethnicity                                                                                       |                                                   |                |                    |               |               |               |               |                  |                                                   |                 |               |                |                |                 |                                                   |                |               |               |                 |                                                   |
| Afro-descendant                                                                                      | 2                                                 | 14             | 7                  | 0             | 0             | 1             | 14            | 8                | 0                                                 | 6               | 16            | 1              | 6              | 6               | 0                                                 | 0              | 0             | 1             | 0               | 5                                                 |
| White                                                                                                | 56                                                | 53             | 12                 | 19            | 5             | 9             | 27            | 36               | 6                                                 | 28              | 3             | 4              | 35             | 19              | 83                                                | 59             | 55            | 94            | 77              | 44                                                |
| Indigenous                                                                                           | 1                                                 | 0              | 1                  | 2             | 11            | 1             | 2             | 2                | 9                                                 | 2               | 1             | 2              | 0              | 2               | 0                                                 | 1              | 0             | 0             | 1               | 2                                                 |
| Mixed race                                                                                           | 38                                                | 32             | 77                 | 75            | 79            | 89            | 52            | 51               | 81                                                | 56              | 78            | 94             | 56             | 69              | 13                                                | 37             | 42            | 4             | 20              | 47                                                |
| Others                                                                                               | 3                                                 | 0              | 3                  | 4             | 6             | 1             | 5             | 2                | 4                                                 | 8               | 2             | 0              | 3              | 4               | 3                                                 | 2              | 3             | 1             | 3               | 3                                                 |
| Work Sector                                                                                          |                                                   |                |                    |               |               |               |               |                  |                                                   |                 |               |                |                |                 |                                                   |                |               |               |                 |                                                   |
| Public                                                                                               | 62                                                | 98             | 69                 | 69            | 92            | 73            | 55            | 85               | 93                                                | 34              | 86            | 81             | 83             | 66              | 62                                                | 72             | 77            | 23            | 62              | 70                                                |
| Private                                                                                              | 8                                                 | 0              | 24                 | 16            | 3             | 15            | 8             | 5                | 2                                                 | 55              | 10            | 6              | 9              | 25              | 30                                                | 19             | 11            | 73            | 31              | 22                                                |
| Social Security                                                                                      | 30                                                | 0              | 1                  | 10            | 3             | 1             | 35            | 6                | 3                                                 | 1               | 1             | 11             | 1              | 3               | 2                                                 | 0              | 5             | 1             | 2               | 4                                                 |
| Academic Sector                                                                                      | 1                                                 | 2              | 5                  | 4             | 3             | 8             | 1             | 2                | 1                                                 | 6               | 2             | 1              | 2              | 3               | 5                                                 | 7              | 6             | 3             | 5               | 4                                                 |
| Other                                                                                                | 0                                                 | 1              | 2                  | 1             | 0             | 2             | 1             | 1                | 1                                                 | 3               | 1             | 1              | 5              | 3               | 1                                                 | 1              | 2             | 1             | 1               | 2                                                 |
| Workplace                                                                                            |                                                   |                |                    |               |               |               |               |                  |                                                   |                 |               |                |                |                 |                                                   |                |               |               |                 |                                                   |
| First Level Care Services (Health Centers, Private Offices, Business Offices, Institutional Offices) | 45                                                | 27             | 18                 | 35            | 13            | 32            | 15            | 26               | 61                                                | 23              | 63            | 35             | 38             | 37              | 30                                                | 45             | 24            | 23            | 33              | 33                                                |
| Assistance Services From Other Levels Of Care (Hospitals, Clinics, Polyclinics, Laboratories)        | 30                                                | 43             | 42                 | 33            | 71            | 30            | 56            | 46               | 18                                                | 45              | 16            | 37             | 21             | 32              | 48                                                | 39             | 32            | 67            | 47              | 41                                                |
| State Institutions (Ministries Or Health Secretariats, Social Security, Among Others)                | 21                                                | 22             | 31                 | 23            | 13            | 25            | 26            | 21               | 17                                                | 13              | 14            | 21             | 32             | 19              | 12                                                | 6              | 31            | 2             | 11              | 17                                                |
| Educational Institutions (Schools, Colleges, Universities, Others)                                   | 1                                                 | 3              | 5                  | 5             | 1             | 9             | 2             | 3                | 1                                                 | 10              | 4             | 1              | 3              | 5               | 5                                                 | 7              | 7             | 4             | 6               | 5                                                 |
| Others                                                                                               | 3                                                 | 5              | 4                  | 4             | 3             | 5             | 2             | 4                | 3                                                 | 9               | 3             | 6              | 7              | 7               | 5                                                 | 3              | 7             | 3             | 4               | 5                                                 |
| Had COVID-19                                                                                         |                                                   |                |                    |               |               |               |               |                  |                                                   |                 |               |                |                |                 |                                                   |                |               |               |                 |                                                   |
| Yes                                                                                                  | 40                                                | 44             | 63                 | 59            | 51            | 60            | 39            | 48               | 74                                                | 47              | 63            | 63             | 60             | 57              | 48                                                | 34             | 65            | 42            | 44              | 50                                                |
| No                                                                                                   | 54                                                | 54             | 33                 | 32            | 47            | 35            | 60            | 49               | 24                                                | 47              | 30            | 34             | 36             | 38              | 48                                                | 65             | 32            | 56            | 52              | 46                                                |
| Do not know                                                                                          | 6                                                 | 2              | 3                  | 9             | 2             | 5             | 2             | 3                | 3                                                 | 6               | 7             | 3              | 3              | 5               | 4                                                 | 2              | 3             | 2             | 3               | 4                                                 |
| Tested for COVID-19                                                                                  |                                                   |                |                    |               |               |               |               |                  |                                                   |                 |               |                |                |                 |                                                   |                |               |               |                 |                                                   |
| Yes                                                                                                  | 76                                                | 92             | 94                 | 89            | 88            | 95            | 95            | 90               | 93                                                | 88              | 90            | 94             | 85             | 89              | 77                                                | 91             | 92            | 91            | 82              | 87                                                |
| No                                                                                                   | 24                                                | 9              | 6                  | 11            | 12            | 5             | 5             | 10               | 7                                                 | 12              | 10            | 6              | 15             | 11              | 23                                                | 9              | 8             | 10            | 17              | 13                                                |
| Do not know                                                                                          | 0                                                 | 0              | 0                  | 0             | 0             | 0             | 0             | 0                | 0                                                 | 0               | 0             | 0              | 0              | 0               | 1                                                 | 0              | 0             | 0             | 0               | 0                                                 |
| Know where to go to be vaccinated for COVID-19                                                       |                                                   |                |                    |               |               |               |               |                  |                                                   |                 |               |                |                |                 |                                                   |                |               |               |                 |                                                   |
| Yes                                                                                                  | 100                                               | 100            | 100                | 100           | 98            | 100           | 99            | 99               | 99                                                | 99              | 100           | 99             | 100            | 99              | 100                                               | 99             | 100           | 99            | 100             | 99                                                |
| No                                                                                                   | 0                                                 | 0              | 1                  | 0             | 2             | 0             | 1             | 1                | 1                                                 | 1               | 0             | 1              | 0              | 1               | 0                                                 | 1              | 0             | 1             | 0               | 1                                                 |
| Have access to COVID-19 vaccination services                                                         |                                                   |                |                    |               |               |               |               |                  |                                                   |                 |               |                |                |                 |                                                   |                |               |               |                 |                                                   |
| Yes                                                                                                  | 100                                               | 97             | 99                 | 99            | 98            | 100           | 99            | 98               | 100                                               | 99              | 99            | 99             | 99             | 99              | 99                                                | 100            | 100           | 100           | 100             | 99                                                |
| No                                                                                                   | 0                                                 | 3              | 1                  | 1             | 2             | 0             | 1             | 2                | 0                                                 | 1               | 1             | 1              | 1              | 1               | 1                                                 | 0              | 0             | 0             | 0               | 1                                                 |
| Ever been vaccinated for COVID-19                                                                    |                                                   |                |                    |               |               |               |               |                  |                                                   |                 |               |                |                |                 |                                                   |                |               |               |                 |                                                   |
| Yes                                                                                                  | 99                                                | 100            | 99                 | 99            | 99            | 100           | 100           | 100              | 100                                               | 99              | 99            | 100            | 99             | 99              | 99                                                | 99             | 99            | 100           | 99              | 99                                                |
| Single dose (on a one- dose schedule)                                                                | 0                                                 | 2              | 1                  | 2             | 1             | 0             | 0             | 1                | 1                                                 | 1               | 1             | 1              | 1              | 1               | 0                                                 | 0              | 0             | 0             | 0               | 1                                                 |
| Single dose and booster dose/ additional dose                                                        | 3                                                 | 9              | 7                  | 3             | 6             | 5             | 2             | 7                | 6                                                 | 5               | 5             | 3              | 4              | 5               | 3                                                 | 2              | 3             | 2             | 2               | 4                                                 |
| First dose (in a two- dose schedule)                                                                 | 0                                                 | 0              | 3                  | 2             | 1             | 1             | 0             | 1                | 1                                                 | 1               | 2             | 1              | 4              | 2               | 0                                                 | 0              | 0             | 0             | 0               | 1                                                 |
| First and second dose (in a two- dose schedule)                                                      | 3                                                 | 3              | 25                 | 16            | 7             | 5             | 4             | 7                | 15                                                | 12              | 9             | 2              | 18             | 11              | 4                                                 | 1              | 4             | 4             | 3               | 7                                                 |
| First dose, second dose and booster dose/ additional dose                                            | 87                                                | 81             | 56                 | 67            | 74            | 82            | 89            | 77               | 64                                                | 74              | 74            | 83             | 70             | 75              | 86                                                | 28             | 83            | 77            | 71              | 74                                                |
| Two booster doses/additional dose in any schedule (single dose or two doses)                         | 6                                                 | 5              | 7                  | 9             | 10            | 7             | 5             | 7                | 12                                                | 6               | 8             | 11             | 2              | 7               | 6                                                 | 68             | 9             | 16            | 23              | 12                                                |
| No Response (for the doses received)                                                                 | 0.0000                                            | 0.0000         | 0.0000             | 0.0000        | 0.0000        | 0.0000        | 0.0000        | 0.0000           | 0.0000                                            | 0.0000          | 0.0000        | 0.0000         | 0.0000         | 0.0000          | 0                                                 | 0              | 0             | 0             | 0               | 0                                                 |
| No                                                                                                   | 1                                                 | 0              | 1                  | 1             | 1             | 0             | 0             | 1                | 0                                                 | 1               | 2             | 1              | 1              | 1               | 1                                                 | 2              | 1             | 1             | 1               | 1                                                 |
| able to be vaccinated at workplace                                                                   |                                                   |                |                    |               |               |               |               |                  |                                                   |                 |               |                |                |                 |                                                   |                |               |               |                 |                                                   |
| Yes                                                                                                  | 90                                                | 95             | 84                 | 70            | 81            | 82            | 90            | 89               | 89                                                | 74              | 89            | 81             | 90             | 82              | 65                                                | 82             | 77            | 44            | 68              | 79                                                |
| No                                                                                                   | 5                                                 | 1              | 9                  | 21            | 12            | 13            | 3             | 6                | 2                                                 | 19              | 5             | 10             | 3              | 11              | 28                                                | 10             | 13            | 48            | 24              | 14                                                |
| No Response                                                                                          | 5                                                 | 4              | 6                  | 8             | 6             | 5             | 8             | 5                | 9                                                 | 6               | 4             | 9              | 6              | 7               | 7                                                 | 6              | 9             | 8             | 7               | 6                                                 |
| Skipped due to previous response                                                                     | 1                                                 | 0              | 1                  | 1             | 1             | 0             | 0             | 1                | 0                                                 | 1               | 2             | 1              | 1              | 1               | 1                                                 | 2              | 1             | 1             | 1               | 1                                                 |
| When will receive first vaccine dose (among those not yet vaccinated)                                |                                                   |                |                    |               |               |               |               |                  |                                                   |                 |               |                |                |                 |                                                   |                |               |               |                 |                                                   |
| As soon as you are eligible                                                                          | 0                                                 | 0              | 0                  | 0             | 0             | 0             | 0             | 0                | 0                                                 | 0               | 1             | 0              | 1              | 0               | 0                                                 | 0              | 0             | 0             | 0               | 0                                                 |
| Not very soon, but maybe one day                                                                     | 0                                                 | 0              | 1                  | 1             | 0             | 0             | 0             | 0                | 0                                                 | 1               | 0             | 1              | 0              | 0               | 1                                                 | 1              | 0             | 1             | 1               | 0                                                 |
| Never                                                                                                | 1                                                 | 0              | 1                  | 0             | 0             | 0             | 0             | 0                | 0                                                 | 0               | 0             | 0              | 0              | 0               | 0                                                 | 1              | 0             | 0             | 0               | 0                                                 |
| Skipped due to previous response                                                                     | 99                                                | 100            | 99                 | 99            | 99            | 100           | 100           | 100              | 100                                               | 99              | 99            | 100            | 99             | 99              | 99                                                | 99             | 99            | 100           | 99              | 99                                                |
| When intend to receive next vaccine dose (among those partially vaccinated)                          |                                                   |                |                    |               |               |               |               |                  |                                                   |                 |               |                |                |                 |                                                   |                |               |               |                 |                                                   |
| As soon as you are eligible                                                                          | 2                                                 | 5              | 9                  | 11            | 9             | 5             | 2             | 6                | 13                                                | 10              | 9             | 1              | 20             | 10              | 3                                                 | 0              | 5             | 2             | 2               | 6                                                 |

|                                  |    |    |    |    |    |    |    |    |    |    |    |    |    |    |    |    |    |    |    |    |
|----------------------------------|----|----|----|----|----|----|----|----|----|----|----|----|----|----|----|----|----|----|----|----|
| Not very soon, but maybe one day | 1  | 0  | 15 | 7  | 1  | 0  | 1  | 2  | 3  | 4  | 2  | 1  | 2  | 3  | 2  | 0  | 0  | 1  | 1  | 2  |
| Never                            | 1  | 0  | 4  | 1  | 0  | 1  | 1  | 1  | 1  | 0  | 1  | 1  | 0  | 0  | 0  | 1  | 0  | 1  | 0  | 0  |
| No Response                      | 1  | 0  | 1  | 1  | 1  | 0  | 0  | 1  | 0  | 1  | 2  | 1  | 1  | 1  | 1  | 2  | 1  | 1  | 1  | 1  |
| Skipped due to previous response | 96 | 95 | 71 | 80 | 90 | 94 | 96 | 91 | 83 | 85 | 87 | 97 | 76 | 86 | 95 | 97 | 95 | 95 | 96 | 91 |

Cells hold the weighted column % of respondents.  
Figures in each column sum to 100% in each section of the table.  
Ever been vaccinated for COVID-19 section: The YES and NO rows will sum up to 100%. The Vaccination details will sum up to the YES %.
