# Supplementary material for: Understanding COVID-19 Vaccine Acceptance among Latin American Health Workers: Implications for Designing Interventions
Source: MDPI journal article supplement (doi:10.3390/vaccines11091471), 2023-09-10
Supplement: s1 [file s1]

## Acceptance of COVID-19 Vaccines in Latin American Health Workers

---

Start of Block: Default Question Block

### Knowledge, attitudes, and practices of health workers about COVID-19 vaccines in Latin America

---

Thank you very much for your interest in this survey. The purpose of the study is to document the knowledge, attitudes, and practices of health workers regarding COVID-19 vaccines in Latin American countries. A health worker is a person who carries out activities whose fundamental purpose is to improve health in their respective communities. Only health workers will participate in the survey. We estimate that the questionnaire will take no more than eight (8) minutes to complete. Please read the consent form and, if you agree to participate, click – YES – in the box at the bottom of the form.

---

Q1 I confirm that I am a health worker

☐ Yes ( 1)

☐ No ( 2)

---

*skip To : End of Survey If I confirm that I am a health worker = No*

---

## **Informed Consent**

**Study Title:** Knowledge, Attitudes and Practices of health workers about COVID-19 vaccines in Latin America.

**Researchers:** Pan American Health Organization (PAHO) - Comprehensive Family Immunization Unit - Family, Health Promotion and Life Course Department: Tamara Rivera, Martha Velandia, Maite Vera, Dale Rhoda. Health Systems and Services Unit / Human Resources for Health Unit - Department of Health Systems and Services: Silvia Cassiani, Malhi Cho, Hernan Sepúlveda.

**Purpose:** Document the knowledge, attitudes and practices of health workers regarding vaccines against COVID-19 in Latin American countries, which will allow support in the development and improvement of communication strategies and approaches on vaccines. against COVID-19 aimed at this priority group, with the aim of increasing the acceptance of the vaccine and improving confidence.

**Potential Benefits:** The study points to a better understanding of the acceptance of health workers towards the COVID-19 vaccine, which will allow PAHO to support the development and improvement of communication strategies on COVID vaccines. -19, and support the development of public policies, to increase the acceptance of the vaccine, improving confidence and, therefore, allowing an effective promotion of the vaccine among the general population.

**Potential Risks:** There are no known or expected risks from participating in this study. PAHO will share the results with ministries of health and professional associations using information consolidated at the regional level, so there is no possibility of tracing responses back to individual participants.

**Privacy Protection:** The researchers listed on the first page of this form are the only people who will have access to information linking individual participants to survey responses.

### **Consent**

I understand that I am being asked to participate in a PAHO/WHO study to answer questions related to health workers' knowledge, attitudes, and practices regarding COVID-19 vaccines in Latin America. I understand that it is my voluntary decision to participate in this study and/or withdraw from the study at any time. A summary of the survey results will be provided to me at the end of the study, should I request a copy. I understand what this study involves and I freely agree to participate. If you have any questions or concerns, either before or after your participation, please do not hesitate to contact:

**Dr. Martha Velandia at +1 202-733-8269 or email [velandiam@paho.org](mailto:velandiam@paho.org)**

**Dr. Tamara Rivera at +1 246 - 851-1802 or by email [riveratam@paho.org](mailto:riveratam@paho.org)**

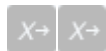

Q2 Country where you work:

Argentina 1  
Bolivia 2  
Colombia 3  
Costa Rica 4  
Cuba 5  
Chile 6  
Ecuador 7  
El Salvador 8  
Guatemala 9  
Honduras 10  
Nicaragua 11  
Panama 12  
Paraguay 13  
Peru 14  
Dominican Republic 15  
Uruguay 16  
Venezuela 17

Q3 I have read the description of the study and I consent to participate in it:

☐ Yes ( 1)

☐ No ( 2)

*skip To : End of Survey If I have read the description of the study and I agree to participate in it: = No*

Q4 Gender

☐ Female ( 1)

☐ Male ( 2)

☐ Other ( 3)

Q5 Age (Years)

---

Q6 Ethnicity/Race

- ☐ Afro-descendant ( 1)
- ☐ White ( 2)
- ☐ Indigenous ( 3)
- ☐ Mixed race ( 4)
- ☐ Others ( 5)

---

*Display This Question:*

*If Ethnicity /Race = Others*

Q6OPS Ethnicity/Race - Other: ( *Please specify*)

---

---

Q7 Sector where you work (*Sector to which you dedicate more hours of work. If you have several jobs with the same workload, please choose one*)

- ☐ Public ( 1)
- ☐ Private ( 2)
- ☐ Security Community ( 3)
- ☐ Academic Sector ( 4)
- ☐ Other ( 5)

---

*Display This Question:*

*If Sector where you work (Sector to which you spend more hours of work. If you have various jobs with... = Other*

Q7OPS Sector where you work - Other: ( *Please specify* )

---

---

Q8 Place of work (*According to your previous answer, please select the place where you spend more hours of work. If you have several jobs with the same workload, please choose one*)

- ☐ First-level care services (health centers, private clinics, company clinics, institutional clinics). (one)
- ☐ Care services at other levels of care (hospitals, clinics, polyclinics, laboratories). (two)
- ☐ State institutions (Ministries or Secretaries of Health, Social Security, among others). (3)
- ☐ Educational institutions (schools, colleges, universities, others). (4)
- ☐ Others ( 5)

---

*Display This Question:*

*If Workplace (According to your previous answer, please select the place where you work... = Others*

Q8OPS Workplace - Other: (*Please specify*)

---

Q9 Profession

- ☐ Doctor overall ( 1)
- ☐ Medical specialist (clinical, surgical and emergency) ( 2)
- ☐ Nurse ( graduate ) ( 3)
- ☐ Licensed nurse with specialty (clinical, surgical and emergency) ( 4)
- ☐ Midwifery professional (midwife/professional midwife/ obstetrician ) ( 5)
- ☐ Dentist / Dentist ( 6)
- ☐ Psychologist ( 7)
- ☐ Pharmacist ( 8)
- ☐ Professional in charge of hygiene and environmental and occupational health ( 9)
- ☐ Public health professional ( 10)
- ☐ Health administrative management professional ( 11)
- ☐ Physiotherapist ( 12)
- ☐ Dietician and nutritionist ( 13)
- ☐ Biologist , Microbiologist and Bacteriologist ( 14)
- ☐ Nursing Technician ( 15)
- ☐ Nursing assistant ( 16 )
- ☐ Other technical in health ( 17)
- ☐ Other ( 18)

---

*Display This Question:*

*If Profession = Other*

Q9OPS Profession - Other: *(Please specify)*

---

Q10 Do you have, or have you had, the COVID-19 disease?:

- ☐ Yes ( 1)
  - ☐ No ( 2)
  - ☐ Don't know ( 3)
- 

Q11 Have you had tests to find out if you have had the COVID 19 disease?

- ☐ Yes ( 1)
- ☐ No ( 2)
- ☐ Don't know ( 3)

End of Block: Default Question Block

---

Please share with us how much you agree or disagree with the statements below.

**Q12 Attitudes towards vaccines**

|                                                                                                                                      | Completely<br>Agree<br>(1) | Agree<br>(2)          | Disagree<br>(3)       | Completely<br>disagree<br>(4) |
|--------------------------------------------------------------------------------------------------------------------------------------|----------------------------|-----------------------|-----------------------|-------------------------------|
| Vaccines are important to my health.<br>(Q12a)                                                                                       | <input type="radio"/>      | <input type="radio"/> | <input type="radio"/> | <input type="radio"/>         |
| Vaccination is a good way to protect<br>myself from diseases. (Q12b)                                                                 | <input type="radio"/>      | <input type="radio"/> | <input type="radio"/> | <input type="radio"/>         |
| In general, vaccines are safe. (Q12c)                                                                                                | <input type="radio"/>      | <input type="radio"/> | <input type="radio"/> | <input type="radio"/>         |
| In general, vaccines are effective.<br>(Q12d)                                                                                        | <input type="radio"/>      | <input type="radio"/> | <input type="radio"/> | <input type="radio"/>         |
| Getting vaccinated is important to the<br>health of others in my community.<br>(Q12e)                                                | <input type="radio"/>      | <input type="radio"/> | <input type="radio"/> | <input type="radio"/>         |
| The information given to me by the<br>Health authorities (Ministry or<br>Secretary of Health) is reliable and<br>trustworthy. (Q12f) | <input type="radio"/>      | <input type="radio"/> | <input type="radio"/> | <input type="radio"/>         |
| The information my health care<br>provider gives me is reliable and<br>trustworthy. (Q12g)                                           | <input type="radio"/>      | <input type="radio"/> | <input type="radio"/> | <input type="radio"/>         |
| In general, I do what my doctor or<br>health care provider recommends<br>regarding vaccinations for me and my<br>family. (Q12h)      | <input type="radio"/>      | <input type="radio"/> | <input type="radio"/> | <input type="radio"/>         |



**Q13 Predisposition regarding vaccinations**

|                                                                                                                                                                                                                                         | Completely<br>Agree<br>(1) | Agree<br>(2)          | Disagree<br>(3)       | Completely<br>disagree<br>(4) |
|-----------------------------------------------------------------------------------------------------------------------------------------------------------------------------------------------------------------------------------------|----------------------------|-----------------------|-----------------------|-------------------------------|
| Newer vaccines pose more risks than older vaccines. (Q13a)                                                                                                                                                                              | <input type="radio"/>      | <input type="radio"/> | <input type="radio"/> | <input type="radio"/>         |
| I would recommend a new vaccine to my friends and family. (Q13b)                                                                                                                                                                        | <input type="radio"/>      | <input type="radio"/> | <input type="radio"/> | <input type="radio"/>         |
| I am concerned about the <b><u>minor adverse effects</u></b> that the vaccines may cause in me ( <i>these are those signs and symptoms that are easily tolerated. They do not require therapy neither intervention medical</i> ) (Q13c) | <input type="radio"/>      | <input type="radio"/> | <input type="radio"/> | <input type="radio"/>         |
| I am concerned about the <b><u>serious adverse effects</u></b> that vaccines can cause in me ( <i>Signs or symptoms that incapacitate and disable me from carrying out usual activities</i> ) (Q13d)                                    | <input type="radio"/>      | <input type="radio"/> | <input type="radio"/> | <input type="radio"/>         |

End of Block: Block 1

Start of Block: Block 2

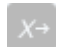

**Q14 Attitudes of health workers towards COVID-19 vaccines**

|                                                                                                                                                                                                                                                                                                                                              | Completely Agree<br>(1) | Agree<br>(2)          | Disagree<br>(3)       | Completely disagree<br>(4) |
|----------------------------------------------------------------------------------------------------------------------------------------------------------------------------------------------------------------------------------------------------------------------------------------------------------------------------------------------|-------------------------|-----------------------|-----------------------|----------------------------|
| The coronavirus (COVID-19) vaccine will protect me from severe forms of the COVID-19 disease. (Q14a)                                                                                                                                                                                                                                         | <input type="radio"/>   | <input type="radio"/> | <input type="radio"/> | <input type="radio"/>      |
| I trust the scientific approval process of the available vaccines against coronavirus (COVID-19) in my country. (Q14b)                                                                                                                                                                                                                       | <input type="radio"/>   | <input type="radio"/> | <input type="radio"/> | <input type="radio"/>      |
| Getting vaccinated against the coronavirus (COVID-19), is or will be good for my health. (Q14c)                                                                                                                                                                                                                                              | <input type="radio"/>   | <input type="radio"/> | <input type="radio"/> | <input type="radio"/>      |
| I would recommend the COVID-19 vaccine to <b>eligible people</b> ( <i>Criteria established by the Ministry of Health of each country. May include but are not limited to: essential front-line employees, the elderly, people with an underlying medical condition that increases their risk of serious illness, pregnant women</i> ) (Q14d) | <input type="radio"/>   | <input type="radio"/> | <input type="radio"/> | <input type="radio"/>      |

**Q15 Availability of the coronavirus vaccine (COVID-19):**

|                                                        | Yes<br>(1)            | No<br>(2)             |
|--------------------------------------------------------|-----------------------|-----------------------|
| I know where to go to be vaccinated. (Q15a)            | <input type="radio"/> | <input type="radio"/> |
| I have access to COVID-19 vaccination services. (Q15b) | <input type="radio"/> | <input type="radio"/> |

Display This Question:

*If Coronavirus (COVID-19) Vaccine Availability: = I have access to COVID-19 vaccination services. [ No ]*

Q16 It is difficult for me to access the COVID-19 vaccine due to:

(Please post a comment that answers a complete sentence)

---

Q17 Availability of the coronavirus vaccine (COVID-19):

|                                                  | Yes<br>(1)            | No<br>(2)             |
|--------------------------------------------------|-----------------------|-----------------------|
| I have ever received a vaccine against COVID-19. | <input type="radio"/> | <input type="radio"/> |

Display This Question:

If Coronavirus (COVID-19) Vaccine Availability: = I have ever received a COVID-19 vaccine. [ Yes ]

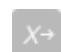

Q18 Availability of the coronavirus vaccine (COVID-19):

|                                                                            | Yes<br>(1)            | No<br>(2)             |
|----------------------------------------------------------------------------|-----------------------|-----------------------|
| I have been able to get vaccinated against COVID-19 at <u>my workplace</u> | <input type="radio"/> | <input type="radio"/> |

Display this Question :

If Coronavirus (COVID-19) Vaccine Availability: = I have ever received a COVID-19 vaccine. [ Yes ]

Q19 Which of the following doses of the COVID-19 vaccine have you received?:

- ☐ Single dose (on a one- dose schedule) ( 1)
- ☐ Single dose and booster dose/ additional dose ( 2)
- ☐ First dose (in a two- dose schedule) ( 3)
- ☐ First and second dose (in a two- dose schedule) ( 4)
- ☐ First dose, second dose and booster dose/ additional dose ( 5)
- ☐ Two booster doses/additional dose in any schedule (single dose or two doses) ( 6)

---

*Display this Question:*

*If Coronavirus (COVID-19) Vaccine Availability: = I have ever received a COVID-19 vaccine. [ No ]*

Q20 When do you intend to get vaccinated against COVID-19?

- ☐ As soon as eligible ( 1)
- ☐ Not very soon, but maybe someday ( 2)
- ☐ Never ( 3)

---

*Display This Question:*

*If Which of the following doses of the COVID-19 vaccine have you received?: = Single dose (on a one-dose schedule)*

*Or Which of the following doses of the COVID-19 vaccine have you received: = First dose (in a two-dose schedule)*

*Or Which of the following doses of the COVID-19 vaccine have you received: = First and second doses (in a two-dose schedule)*

Q21 I do not have the complete vaccination schedule or the booster doses/additional doses against the COVID-19 disease due to: *(Please answer your reasons in a complete sentence)*

---

---

*Display this Question:*

*If Which of the following doses of the COVID-19 vaccine have you received: = First dose (in a two-dose schedule)*

*Or Which of the following doses of the COVID-19 vaccine have you received: = Single dose (on a one-dose schedule)*

*Or Which of the following doses of the COVID-19 vaccine have you received: = First and second doses (in a two-dose schedule)*

Q22 When do you intend to receive the next dose of the COVID-19 vaccine?

- ☐ As soon as eligible ( 1)
- ☐ Not very soon, but maybe someday ( 2)
- ☐ Never ( 3)

*Display This Question:*

*If Coronavirus (COVID-19) Vaccine Availability: = I have ever received a COVID-19 vaccine. [ No ]*

*Or Which of the following doses of the COVID-19 vaccine have you received: = Single dose (on a one-dose schedule)*

*Or Which of the following doses of the COVID-19 vaccine have you received: = First dose (in a two-dose schedule)*

*Or Which of the following doses of the COVID-19 vaccine have you received: = First and second doses (in a two-dose schedule)*

Q23 Please indicate your reasons for delaying or refusing COVID-19 vaccines

|                                                                                                         | Completely<br>Agree<br>(1) | Agree<br>(2)          | Disagree<br>(3)       | Completely<br>disagree<br>(4) |
|---------------------------------------------------------------------------------------------------------|----------------------------|-----------------------|-----------------------|-------------------------------|
| I still don't know enough about the available vaccines to make a decision. (Q23a)                       | <input type="radio"/>      | <input type="radio"/> | <input type="radio"/> | <input type="radio"/>         |
| I want to gain natural immunity to the virus that causes COVID-19. (Q23b)                               | <input type="radio"/>      | <input type="radio"/> | <input type="radio"/> | <input type="radio"/>         |
| Available vaccines may have been developed too quickly or not thoroughly tested before approval. (Q23c) | <input type="radio"/>      | <input type="radio"/> | <input type="radio"/> | <input type="radio"/>         |
| I believe that vaccines can cause the disease they were designed to prevent. (Q23d)                     | <input type="radio"/>      | <input type="radio"/> | <input type="radio"/> | <input type="radio"/>         |
| I am concerned about the adverse reactions that have been seen when the vaccine is given. (Q23e)        | <input type="radio"/>      | <input type="radio"/> | <input type="radio"/> | <input type="radio"/>         |

*Display This Question:*

*If Coronavirus (COVID-19) Vaccine Availability: = I have ever received a COVID-19 vaccine. [ No ]*

*Or Which of the following doses of the COVID-19 vaccine have you received: = Single dose (on a one-dose schedule)*

*Or Which of the following doses of the COVID-19 vaccine have you received: = First dose (in a two-dose schedule)*

*Or Which of the following doses of the COVID-19 vaccine have you received: = First and second doses (in a two-dose schedule)*

Q24 Other reasons for delaying or refusing the COVID-19 vaccine:

*(Please answer your reasons in a complete sentence)*

---

Q25 The following factors contributed to my opinion of COVID-19 vaccines:

|                                                                                                                            | Completely<br>Agree<br>(1) | Agree<br>(2)          | Disagree<br>(3)       | Completely<br>disagree<br>(4) |
|----------------------------------------------------------------------------------------------------------------------------|----------------------------|-----------------------|-----------------------|-------------------------------|
| The speed with which vaccines were researched and developed. (Q25a)                                                        | <input type="radio"/>      | <input type="radio"/> | <input type="radio"/> | <input type="radio"/>         |
| The scientific topics of SARS-CoV-2 that are constantly being discovered and evolving. (Q25b)                              | <input type="radio"/>      | <input type="radio"/> | <input type="radio"/> | <input type="radio"/>         |
| The recommendations issued by scientists and international organizations. (Q25c)                                           | <input type="radio"/>      | <input type="radio"/> | <input type="radio"/> | <input type="radio"/>         |
| The actions and opinions of my friends, family, and colleagues about vaccines. (Q25d)                                      | <input type="radio"/>      | <input type="radio"/> | <input type="radio"/> | <input type="radio"/>         |
| The actions and opinions of my religious leaders. (Q25e)                                                                   | <input type="radio"/>      | <input type="radio"/> | <input type="radio"/> | <input type="radio"/>         |
| The relationship between the proportion of vaccinated with hospitalization and mortality. (Q25f)                           | <input type="radio"/>      | <input type="radio"/> | <input type="radio"/> | <input type="radio"/>         |
| My own research on COVID-19 vaccines. (Q25g)                                                                               | <input type="radio"/>      | <input type="radio"/> | <input type="radio"/> | <input type="radio"/>         |
| The country in which the available vaccines were developed/manufactured. (Q25h)                                            | <input type="radio"/>      | <input type="radio"/> | <input type="radio"/> | <input type="radio"/>         |
| The information I have seen on social networks (Facebook, Instagram, Twitter, Tiktok , Youtube , WhatsApp, others). (Q25i) | <input type="radio"/>      | <input type="radio"/> | <input type="radio"/> | <input type="radio"/>         |

---

Q26 Other factors that contributed to my opinion about COVID-19 vaccines  
(please describe/specify in the space provided)

---

End of Block: Block 2

---

Start of Block: Block 3

Q27 Attitudes of health workers towards the **influenza vaccine**

|                                                          | Completely Agree<br>(1) | Agree<br>(2)          | Disagree<br>(3)       | Completely disagree<br>(4) |
|----------------------------------------------------------|-------------------------|-----------------------|-----------------------|----------------------------|
| I would get the <b>flu shot</b> if it was offered to me. | <input type="radio"/>   | <input type="radio"/> | <input type="radio"/> | <input type="radio"/>      |

*Display This Question:*

*If Health worker attitudes towards influenza vaccination = I would receive the < strong >influenza vaccine</ strong > if it was offered to me. [ Disagree ]*

*Or Attitudes of health workers towards influenza vaccination = I would receive the < strong >influenza vaccine</ strong > if it was offered to me. [ Strongly disagree ]*

Q28 If you do not agree, what are the reasons? *(Please, answer with a complete sentence your reasons)*

---

Q29 Attitudes of health workers towards the **influenza vaccine**

|                                                                    | Completely Agree<br>(1) | Agree<br>(2)          | Disagree<br>(3)       | Completely disagree<br>(4) |
|--------------------------------------------------------------------|-------------------------|-----------------------|-----------------------|----------------------------|
| I would recommend the <b>flu vaccine</b> to my friends and family. | <input type="radio"/>   | <input type="radio"/> | <input type="radio"/> | <input type="radio"/>      |

*Display This Question:*

*If Health care workers' attitudes toward influenza vaccination = I would recommend the < strong >influenza vaccine</ strong > to my friends and family. [ Disagree ]*

*Or Attitudes of health care workers towards influenza vaccination = I would recommend the < strong >influenza vaccine</ strong > to my friends and family. [ Strongly disagree ]*

Q30 If you do not agree, what are the reasons? *(Please, answer with a complete sentence your reasons)*

---



---

**Q31 Attitudes of health workers towards the hepatitis B vaccine**

|                                                                     | Completely Agree<br>(1) | Agree<br>(2)          | Disagree<br>(3)       | Completely disagree<br>(4) |
|---------------------------------------------------------------------|-------------------------|-----------------------|-----------------------|----------------------------|
| I would get the <b>hepatitis B vaccine</b> if it was offered to me. | <input type="radio"/>   | <input type="radio"/> | <input type="radio"/> | <input type="radio"/>      |

*Display This Question:*

*If Attitudes of health workers towards the hepatitis B vaccine = I would receive the < strong >hepatitis B vaccine </ strong > if it was offered to me. [ Disagree ]*

*Or Attitudes of health workers towards the hepatitis B vaccine = I would receive the < strong >hepatitis B vaccine </ strong > if it was offered to me. [ Strongly disagree ]*

**Q32** If you do not agree, what are the reasons? (Please, answer with a complete sentence your reasons)

---

**Q33 Attitudes of health workers towards the hepatitis B vaccine**

|                                                                    | Completely Agree<br>(1) | Agree<br>(2)          | Disagree<br>(3)       | Completely disagree<br>(4) |
|--------------------------------------------------------------------|-------------------------|-----------------------|-----------------------|----------------------------|
| I would recommend the <b>hepatitis B vaccine</b> to my colleagues. | <input type="radio"/>   | <input type="radio"/> | <input type="radio"/> | <input type="radio"/>      |

*Display This Question:*

*If Attitudes of health workers towards the hepatitis B vaccine = I would recommend the < strong >hepatitis B vaccine</ strong > to my colleagues. [ Disagree ]*

*Or Attitudes of health workers towards the hepatitis B vaccine = I would recommend the < strong >hepatitis B vaccine</ strong > to my colleagues. [ Strongly disagree ]*

**Q34** If you do not agree, what are the reasons? (Please, answer with a complete sentence your reasons)

---

**End of Block: Block 3**

**Start of Block: Block 4**



*Display this Question:*

*If I have read the description of the study and I agree to participate in it: = No*

Thank you for considering taking this survey. Have a nice day.

*skip To : End of Block If Thank you for considering taking this survey. Have a nice day. Is Displayed*

**End of Block: Block 4**

---

**Start of Block: Block 6**

Q35 If there are any additional comments about COVID-19 vaccines for healthcare workers, please write them here:

---

**End of Block: Block 6**

---
