# Supplementary material for: Understanding COVID-19 Vaccine Acceptance among Latin American Health Workers: Implications for Designing Interventions
Source: Vaccines (Basel). 2023 Sep 10;11(9):1471. doi: 10.3390/vaccines11091471 (PMC10536662; doi:10.3390/vaccines11091471)
Supplement: Supplementary file 1 [file vaccines-11-01471-s001.zip]

Archive with 4 entries (4 files):
- File S1.pdf
- File S2.pdf
- File S3.pdf
- Table of Contents.pdf
